# Supplementary material
Source: PubMed Central journal article supplement (PMC5651180)

# Supplementary figure: Lack of association between ERP amplitude and cry amplitude after heel stick

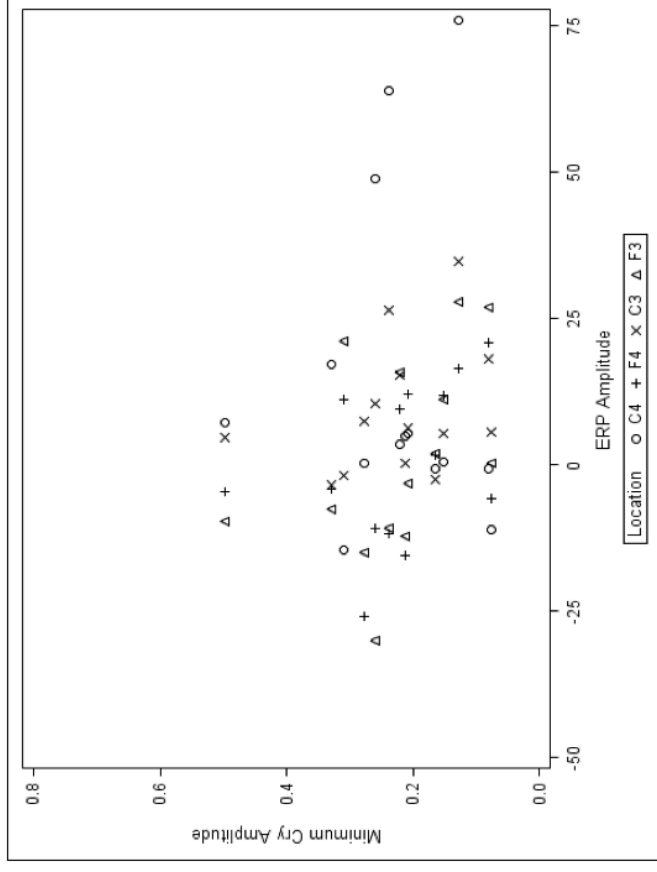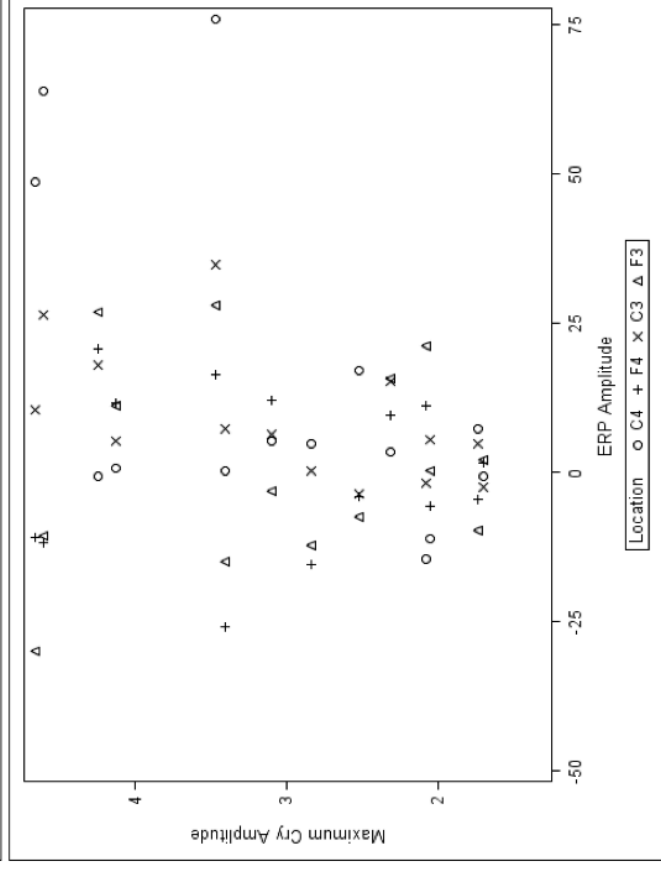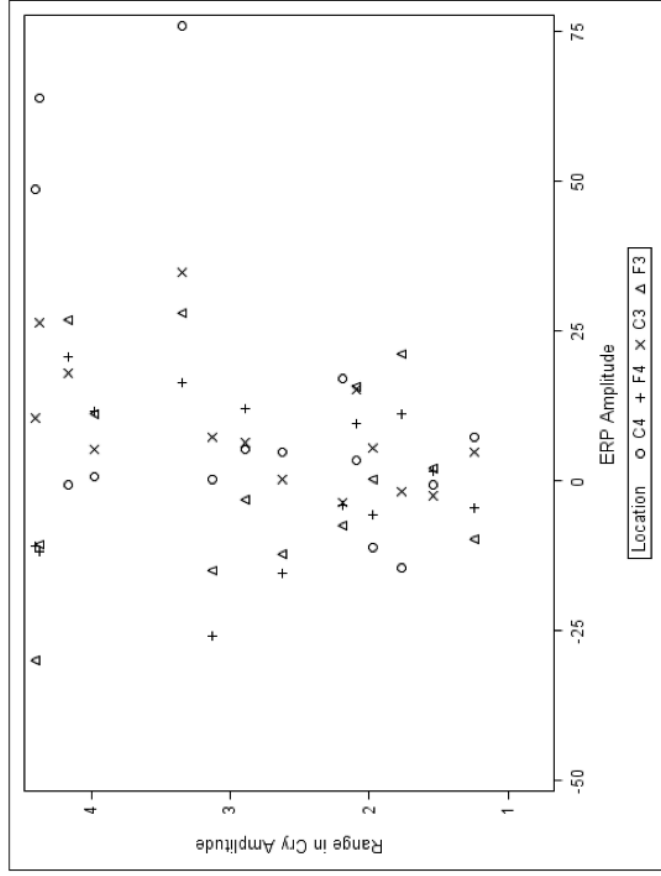

Supplement: NIHMS906839-supplement-Supplemental.pdf [file NIHMS906839-supplement-Supplemental.pdf]
